# Supplementary material
Source: publisher figshare collection journal article supplement (https://springernature.figshare.com/ndownloader/files/22255422)
Supplement: Supplementary file 1 [file 22255422]

Measurement(s),climate
Technology Type(s),digital curation
Factor Type(s),temporal interval • geographic location • proxy type
Sample Characteristic - Environment,climate system
Sample Characteristic - Location,Earth (planet)
